# Supplementary material
Source: MDPI journal article supplement (https://www.mdpi.com/2071-1050/10/4/1077)
Supplement: s1 [file s1]

**Supplementary Data: equations/functions/values used in the quantitative SD model**

**Table 1.** Equations and values used in the quantitative SD model

| Variable Group                                                    | Variable                                             | Type        | Dimension     | Equations/ Initial Value                                                                                                                                                                           |
|-------------------------------------------------------------------|------------------------------------------------------|-------------|---------------|----------------------------------------------------------------------------------------------------------------------------------------------------------------------------------------------------|
| <b>Amount of C&amp;D waste generated or disposed to landfills</b> | Accumulated amount of C&D waste landfilled           | Stock/Level | tonne         | Accumulated amount of C&D waste landfilled = INTEG(Waste landfilling, $1.51 \times 10^6$ )                                                                                                         |
|                                                                   | Amount of C&D waste generated yearly                 | Stock/Level | tonne         | Amount of C&D waste generated yearly = INTEG(Waste generating – Waste reducing, $1.091 \times 10^6 \times 1.001$ )                                                                                 |
|                                                                   | Decreasing rate of landfilling                       | Auxiliary   | 1/Year        | Decreasing rate of landfilling = (“Decreasing rate of inert waste disposed to landfills” + Waste decreasing rate) ÷ 2                                                                              |
|                                                                   | Decreasing rate of inert waste disposed to landfills | Auxiliary   | 1/Year        | "Decreasing rate of inert waste disposed to landfills" = WITH LOOKUP (((“Motivation of off-site sorting of waste” + “Motivation of on-site sorting of waste” + Motivation of waste recycling) ÷ 3) |
|                                                                   | Motivation of off-site sorting of waste              | Auxiliary   | dimensionless | Motivation of off-site sorting of waste = (Motivation of waste management × 0.6+ “Motivation of off-site sorting of waste lookup”(“Unit charge of off-site sorting facilities”)) ÷ 2               |
|                                                                   | Motivation of on-site sorting of waste               | Auxiliary   | dimensionless | Motivation of on-site sorting of waste = (Motivation of waste management × 0.8 + “Motivation of on-site sorting of waste lookup”(Unit charge of public fill reception facilities)) ÷ 2             |
|                                                                   | Motivation of waste management                       | Auxiliary   | dimensionless | Motivation of waste management = WITH LOOKUP (Unit landfill charge)                                                                                                                                |
|                                                                   | Motivation of waste minimization                     | Auxiliary   | dimensionless | Motivation of waste minimization = Motivation of waste management × 0.9                                                                                                                            |

|                                                                                               |                                                                |           |               |                                                                                                                                                                                                                                                                                                                                                                |
|-----------------------------------------------------------------------------------------------|----------------------------------------------------------------|-----------|---------------|----------------------------------------------------------------------------------------------------------------------------------------------------------------------------------------------------------------------------------------------------------------------------------------------------------------------------------------------------------------|
|                                                                                               | Motivation of waste recycling                                  | Auxiliary | dimensionless | Motivation of waste recycling = Motivation of waste management $\times$ 0.7                                                                                                                                                                                                                                                                                    |
|                                                                                               | Waste generating                                               | Auxiliary | tonne/Year    | Waste generating = Waste increasing rate $\times$ "Amount of C&D waste generated yearly"                                                                                                                                                                                                                                                                       |
|                                                                                               | Waste increasing rate                                          | Auxiliary | 1/Year        | Waste increasing rate = Waste increasing rate lookup(Time)                                                                                                                                                                                                                                                                                                     |
|                                                                                               | Waste landfilling                                              | Auxiliary | tonne/Year    | Waste landfilling = "Amount of C&D waste generated yearly" $\times$ (1 – Decreasing rate of landfilling)                                                                                                                                                                                                                                                       |
|                                                                                               | Waste reducing                                                 | Auxiliary | tonne/Year    | Waste reducing = "Amount of C&D waste generated yearly" $\times$ Waste reducing rate                                                                                                                                                                                                                                                                           |
|                                                                                               | Waste reducing rate                                            | Auxiliary | 1/Year        | Waste reducing rate = WITH LOOKUP (Motivation of waste minimization)                                                                                                                                                                                                                                                                                           |
| <b>Government's Cost to supply and operate landfill sites and cost recovery from revenues</b> | Estimated capital cost of NENT Extension                       | Auxiliary | Dollar        | Estimated capital cost of NENT Extension = IF THEN ELSE(Extension of NENT extended landfill capacity > 0, $1.8395 \times 10^9$ , IF THEN ELSE(Remaining capacities of three existing landfills > 0, 0, IF THEN ELSE(Extension of SENT extended landfill capacity > 0, 0, $1.8395 \times 10^9$ )))                                                              |
|                                                                                               | Estimated capital cost of SENT Extension                       | Auxiliary | Dollar        | Estimated capital cost of SENT Extension = IF THEN ELSE(Extension of SENT extended landfill capacity > 0, $1.993 \times 10^9$ , IF THEN ELSE(Remaining capacities of three existing landfills > 0, 0, $1.993 \times 10^9$ ))                                                                                                                                   |
|                                                                                               | Estimated capital cost of WENT Extension                       | Auxiliary | Dollar        | Estimated capital cost of WENT Extension = IF THEN ELSE(Extension of WENT extended landfill capacity > 0, $9.5 \times 10^6$ , IF THEN ELSE(Remaining capacities of three existing landfills > 0, 0, IF THEN ELSE(Extension of SENT extended landfill capacity > 0, 0, IF THEN ELSE(Extension of NENT extended landfill capacity > 0, 0, $9.5 \times 10^6$ )))) |
|                                                                                               | Landfill operating cost                                        | Auxiliary | Dollar        | Landfill operating cost = IF THEN ELSE(Time < 2016, ("Accumulated amount of C&D waste landfilled" $\times$ Unit operating cost) $\times$ 0.5, "Accumulated amount of C&D waste landfilled" $\times$ Unit operating cost)                                                                                                                                       |
|                                                                                               | Government payback period (with percentage of costs recovered) | Auxiliary | dimensionless | Government payback period (with percentage of costs recovered) = (Total landfill charge $\div$ Total government cost for landfill disposal) $\times$ 100                                                                                                                                                                                                       |

|                                                    |                                                |           |              |                                                                                                                                                                                                                                                                                                                                                                                                                                                                                                      |
|----------------------------------------------------|------------------------------------------------|-----------|--------------|------------------------------------------------------------------------------------------------------------------------------------------------------------------------------------------------------------------------------------------------------------------------------------------------------------------------------------------------------------------------------------------------------------------------------------------------------------------------------------------------------|
|                                                    | Total Capital costs                            | Auxiliary | Dollar       | Total Capital costs = IF THEN ELSE(Time < 2016, (Capital costs of three existing landfills + Estimated capital costs of NENT extension + Estimated capital costs of SENT extension + Estimated capital costs of WENT extension) × 0.5, Capital costs of three existing landfills + Estimated capital costs of NENT extension + Estimated capital costs of SENT extension + Estimated capital costs of WENT extension)                                                                                |
|                                                    | Total government cost for landfill disposal    | Auxiliary | Dollar       | Total government cost for landfill disposal = Landfill operating cost + Total Capital costs                                                                                                                                                                                                                                                                                                                                                                                                          |
|                                                    | Total landfill charge                          | Auxiliary | Dollar       | Total landfill charge = "Amount of C&D waste landfilled" × Unit landfill charge                                                                                                                                                                                                                                                                                                                                                                                                                      |
|                                                    | Unit landfill charge                           | Auxiliary | Dollar/tonne | IF THEN ELSE(Time < 2016, 125, 125)                                                                                                                                                                                                                                                                                                                                                                                                                                                                  |
| <b>Landfill Capacities and extension schedules</b> | Total remaining landfill capacity              | Auxiliary | tonne        | Total remaining landfill capacity = Remaining capacities of three existing landfills + Extension of NENT extended landfill capacity + Extension of SENT extended landfill capacity + Extension of WENT extended landfill capacity                                                                                                                                                                                                                                                                    |
|                                                    | Remaining capacity of three existing landfills | Auxiliary | tonne        | Remaining capacity of three existing landfills = IF THEN ELSE( $1.82264 \times 10^7 - \text{"Accumulated amount of C\&D waste landfilled"} < 0$ , 0, $1.82264 \times 10^7 - \text{"Accumulated amount of C\&D waste landfilled"}$ )                                                                                                                                                                                                                                                                  |
|                                                    | Extension of NENT extended capacity            | Auxiliary | tonne        | Extension of NENT extended capacity = IF THEN ELSE( $9.035 \times 10^6 + 1.82264 \times 10^7 + 6.6025 \times 10^6 - \text{"Accumulated amount of C\&D waste landfilled"} < 0$ , 0, IF THEN ELSE( $1.82264 \times 10^7 + 9.035 \times 10^6 - \text{"Accumulated amount of C\&D waste landfilled"} < 0$ , $9.035 \times 10^6 + 1.82264 \times 10^7 + 6.6025 \times 10^6 - \text{"Accumulated amount of C\&D waste landfilled"}$ , 0))                                                                  |
|                                                    | Extension of SENT extended capacity            | Auxiliary | tonne        | Extension of SENT extended capacity = IF THEN ELSE( $9.035 \times 10^6 + 1.82264 \times 10^7 - \text{"Accumulated amount of C\&D waste landfilled"} < 0$ , 0, IF THEN ELSE( $1.82264 \times 10^7 - \text{"Accumulated amount of C\&D waste landfilled"} < 0$ , $9.035 \times 10^6 + 1.82264 \times 10^7 - \text{"Accumulated amount of C\&D waste landfilled"}$ , 0))                                                                                                                                |
|                                                    | Extension of WENT extended capacity            | Auxiliary | tonne        | Extension of WENT extended capacity = IF THEN ELSE( $9.035 \times 10^6 + 1.82264 \times 10^7 + 2.81475 \times 10^7 + 6.6025 \times 10^6 - \text{"Accumulated amount of C\&D waste landfilled"} < 0$ , 0, IF THEN ELSE( $1.82264 \times 10^7 + 9.035 \times 10^6 + 6.6025 \times 10^6 - \text{"Accumulated amount of C\&D waste landfilled"} < 0$ , $9.035 \times 10^6 + 1.82264 \times 10^7 + 2.81475 \times 10^7 + 6.6025 \times 10^6 - \text{"Accumulated amount of C\&D waste landfilled"}$ , 0)) |

|                        |                                                  |             |               |                                                                                                                                                                                            |
|------------------------|--------------------------------------------------|-------------|---------------|--------------------------------------------------------------------------------------------------------------------------------------------------------------------------------------------|
|                        |                                                  |             |               | "Accumulated amount of C&D waste landfilled" < 0, $9.035 \times 10^6 + 1.82264 \times 10^7 + 2.81475 \times 10^7 + 6.6025 \times 10^6 -$ "Accumulated amount of C&D waste landfilled", 0)) |
| <b>Illegal dumping</b> | Accumulated amount of C&D waste illegally dumped | Stock/Level | tonne         | Accumulated amount of C&D waste illegally dumped = INTEG(Illegal dumping, $0.001 \times$ "Accumulated amount of C&D waste landfilled")                                                     |
|                        | Completeness of regulations                      | Auxiliary   | dimensionless | Completeness of regulations =WITH LOOKUP (Time)                                                                                                                                            |
|                        | Expected cost of violation of regulation         | Auxiliary   | Dollar        | Expected cost of violation of regulation = Penalty $\times$ Probability of receiving penalty                                                                                               |
|                        | Decreasing rate of illegal dumping               | Auxiliary   | dimensionless | Decreasing percentage of illegal dumping = WITH LOOKUP (Expected cost of violation of regulation)                                                                                          |
|                        | Effectiveness of execution (prosecution)         | Auxiliary   | dimensionless | Effectiveness of execution (prosecution) = WITH LOOKUP ("Accumulated amount of C&D waste illegally dumped" $\div$ "Accumulated amount of C&D waste landfilled")                            |
|                        | Effectiveness of regulation                      | Auxiliary   | dimensionless | Effectiveness of regulation = Effectiveness of execution (prosecution) $\times$ 0.4 + Completeness of regulations $\times$ 0.2 + Effectiveness of supervision $\times$ 0.4                 |
|                        | Effectiveness of supervision                     | Auxiliary   | dimensionless | Effectiveness of supervision = WITH LOOKUP (Time)                                                                                                                                          |
|                        | Illegal dumping                                  | Auxiliary   | tonne/Year    | Illegal dumping = Waste landfilling $\times$ (Rate of illegal dumping – decreasing rate of illegal dumping)                                                                                |
|                        | Rate of illegal dumping                          | Auxiliary   | dimensionless | Rate of illegal dumping =WITH LOOKUP (Unit landfill charge)                                                                                                                                |

**Table 2:** Lookup table used in the SD model 1 (Source: Environmental Protection Department of Hong Kong and expert estimates)

| Values of average motivation of off-site sorting of waste, on-site sorting of waste, and waste recycling | Values of decreasing rate of inert waste disposed to landfills |
|----------------------------------------------------------------------------------------------------------|----------------------------------------------------------------|
| 0.1                                                                                                      | 0.005                                                          |
| 0.2                                                                                                      | 0.1                                                            |
| 0.3                                                                                                      | 0.21                                                           |
| 0.4                                                                                                      | 0.28                                                           |
| 0.5                                                                                                      | 0.35                                                           |
| 0.6                                                                                                      | 0.5                                                            |
| 0.7                                                                                                      | 0.65                                                           |
| 0.8                                                                                                      | 0.75                                                           |
| 0.9                                                                                                      | 0.85                                                           |

**Table 3:** Lookup table used in the SD model 2 (Source: Environmental Protection Department of Hong Kong and expert estimates)

| Values of unit charge of off-site sorting facilities | Values of motivation of off-site sorting of waste |
|------------------------------------------------------|---------------------------------------------------|
| 75                                                   | 0.7                                               |
| 100                                                  | 0.5                                               |
| 125                                                  | 0.4                                               |
| 150                                                  | 0.38                                              |
| 175                                                  | 0.3                                               |
| 200                                                  | 0.2                                               |
| 225                                                  | 0.1                                               |
| 250                                                  | 0.05                                              |

**Table 4:** Lookup table used in the SD model 3 (Source: Environmental Protection Department of Hong Kong and expert estimates)

| Values of unit charge of public fill facilities | Values of motivation of on-site sorting of waste |
|-------------------------------------------------|--------------------------------------------------|
| 27                                              | 0.7                                              |
| 50                                              | 0.6                                              |
| 75                                              | 0.5                                              |
| 100                                             | 0.45                                             |
| 125                                             | 0.3                                              |
| 150                                             | 0.2                                              |
| 175                                             | 0.1                                              |

**Table 5:** Lookup table used in the SD model 4 (Source: Environmental Protection Department of Hong Kong and expert estimates)

| Values of unit landfill charge | Values of motivation of waste management |
|--------------------------------|------------------------------------------|
| 75                             | 0.05                                     |
| 100                            | 0.1                                      |
| 125                            | 0.15                                     |
| 175                            | 0.18                                     |
| 225                            | 0.23                                     |
| 275                            | 0.27                                     |
| 325                            | 0.3                                      |
| 375                            | 0.35                                     |
| 425                            | 0.4                                      |
| 475                            | 0.45                                     |
| 525                            | 0.5                                      |
| 575                            | 0.6                                      |
| 625                            | 0.7                                      |
| 675                            | 0.8                                      |
| 725                            | 0.9                                      |

**Table 6:** Lookup table used in the SD model 5 (Source: Environmental Protection Department of Hong Kong and expert estimates)

| Values of year | Values of waste increasing rate |
|----------------|---------------------------------|
| 2006           | 0.116                           |
| 2007           | -0.313                          |
| 2008           | 0.055                           |
| 2009           | -0.172                          |
| 2010           | 0.328                           |
| 2011           | -0.166                          |
| 2012           | 0.52                            |
| 2013           | -0.413                          |
| 2014           | 0.296                           |
| 2015           | 0.173                           |
| 2016           | 0.12                            |
| 2017           | 0.6                             |
| 2018           | -0.02                           |
| 2019           | 0.12                            |
| 2020           | -0.19                           |
| 2021           | -0.15                           |
| 2022           | 0.11                            |
| 2023           | -0.13                           |
| 2024           | 0.08                            |
| 2025           | 0.08                            |
| 2026           | 0.08                            |
| 2027           | 0.08                            |
| 2028           | 0.08                            |
| 2029           | 0.08                            |
| 2030           | 0.08                            |

**Table 7:** Lookup table used in the SD model 6 (Source: Environmental Protection Department of Hong Kong and expert estimates)

| Values of motivation of waste minimization | Values of waste reducing rate |
|--------------------------------------------|-------------------------------|
| 0.005                                      | 0.0075                        |
| 0.1                                        | 0.015                         |
| 0.2                                        | 0.02                          |
| 0.3                                        | 0.025                         |
| 0.4                                        | 0.028                         |
| 0.5                                        | 0.03                          |
| 0.6                                        | 0.035                         |
| 0.7                                        | 0.04                          |
| 0.8                                        | 0.045                         |
| 0.9                                        | 0.05                          |

**Table 8:** Lookup table used in the SD model 7 (Source: Environmental Protection Department of Hong Kong and expert estimates)

| Values of unit landfill charge | Values of rate of illegal dumping |
|--------------------------------|-----------------------------------|
| 75                             | 0.008                             |
| 125                            | 0.01                              |
| 175                            | 0.014                             |
| 225                            | 0.017                             |
| 275                            | 0.021                             |
| 325                            | 0.025                             |
| 375                            | 0.028                             |
| 425                            | 0.031                             |
| 475                            | 0.035                             |
| 525                            | 0.041                             |
| 575                            | 0.048                             |
| 625                            | 0.058                             |
| 675                            | 0.07                              |
| 725                            | 0.085                             |



**Table 9:** Lookup table used in the SD model 8 (Source: Environmental Protection Department of Hong Kong and expert estimates)

| Values of expected cost of violation of regulation | Values of decreasing percentage of illegal dumping |
|----------------------------------------------------|----------------------------------------------------|
| 1000                                               | 0.0005                                             |
| 2000                                               | 0.001                                              |
| 3000                                               | 0.0015                                             |
| 4000                                               | 0.002                                              |
| 5000                                               | 0.0025                                             |
| 6000                                               | 0.003                                              |
| 7000                                               | 0.004                                              |
| 8000                                               | 0.005                                              |
| 9000                                               | 0.006                                              |
| 10000                                              | 0.008                                              |
| 11000                                              | 0.01                                               |
| 12000                                              | 0.011                                              |
| 13000                                              | 0.012                                              |
| 14000                                              | 0.013                                              |
| 15000                                              | 0.014                                              |
| 16000                                              | 0.015                                              |
| 17000                                              | 0.016                                              |

**Table 10:** Lookup table used in the SD model 9 (Source: Environmental Protection Department of Hong Kong and expert estimates)

| Values of ("amount of C&D waste illegal dumped" ÷<br>"accumulated amount of C&D waste landfilled") | Values of effectiveness of execution<br>(prosecution) |
|----------------------------------------------------------------------------------------------------|-------------------------------------------------------|
| 0.0005                                                                                             | 0.005                                                 |
| 0.001                                                                                              | 0.09                                                  |
| 0.005                                                                                              | 0.15                                                  |
| 0.01                                                                                               | 0.2                                                   |
| 0.05                                                                                               | 0.25                                                  |
| 0.1                                                                                                | 0.35                                                  |
| 0.15                                                                                               | 0.45                                                  |
| 0.2                                                                                                | 0.5                                                   |
| 0.25                                                                                               | 0.6                                                   |
| 0.3                                                                                                | 0.7                                                   |
| 0.5                                                                                                | 0.9                                                   |
| 0.8                                                                                                | 1                                                     |
| 1                                                                                                  | 1                                                     |

**Table 11:** Lookup table used in the SD model 10 (Source: Environmental Protection Department of Hong Kong and expert estimates)

| Values of effectiveness of regulation | Values of probability of receiving penalty |
|---------------------------------------|--------------------------------------------|
| 0.1                                   | 0.11                                       |
| 0.16                                  | 0.15                                       |
| 0.3                                   | 0.2                                        |
| 0.4                                   | 0.25                                       |
| 0.5                                   | 0.35                                       |
| 0.6                                   | 0.4                                        |
| 0.7                                   | 0.5                                        |
| 0.8                                   | 0.6                                        |
| 0.9                                   | 0.7                                        |

**Table 12:** Lookup table used in the SD model 11 (Source: Environmental Protection Department of Hong Kong and expert estimates)

| Values of year | Values of completeness of regulations |
|----------------|---------------------------------------|
| 2006           | 0.2                                   |
| 2010           | 0.25                                  |
| 2015           | 0.3                                   |
| 2020           | 0.4                                   |
| 2025           | 0.5                                   |
| 2030           | 0.6                                   |

**Table 13:** Lookup table used in the SD model 12 (Source: Environmental Protection Department of Hong Kong and expert estimates)

| Values of year | Values of effectiveness of supervision |
|----------------|----------------------------------------|
| 2006           | 0.15                                   |
| 2010           | 0.25                                   |
| 2015           | 0.4                                    |
| 2020           | 0.5                                    |
| 2025           | 0.6                                    |
| 2030           | 0.7                                    |
